# Supplementary material
Source: Royal Society of Chemistry journal article supplement (doi:10.1039/d6sm00257a)
Supplement: d6sm00257a1.pdf [file d6sm00257a1.pdf]

## Supplementary Information for "Systematic Error Detection in the Database of Liquid Crystals (LiqCryst) Using Predictive Models"

Yoshiaki Uchida, Shizuo Kaji and Naoto Nakano

**Table S1.** Performance metrics for the three-class classification (achiral, chiral, and none) across individual LC phases.

| Phases | $N_V^a$ | accuracy [%] | recall | precision | F1 Score |
|--------|---------|--------------|--------|-----------|----------|
| N      | 18863   | 92.9         | 0.91   | 0.91      | 0.91     |
| SmC    | 4382    | 96.8         | 0.82   | 0.84      | 0.83     |
| SmF    | 266     | 99.8         | 0.73   | 0.82      | 0.77     |
| Sml    | 233     | 99.7         | 0.72   | 0.74      | 0.73     |

<sup>a</sup>The numbers of molecules showing the specific phases.
